# Supplementary material for: Learning differentially shapes prefrontal and hippocampal activity during classical conditioning
Source: eLife journal article supplement (doi:10.7554/elife.65456), 2021-10-19
Supplement: supp [file elife-65456-supp-v1.zip]

Archive with 11 entries (11 files):
- elife_poa_e65456_Transparent_Reporting_File.pdf
- elife_poa_e65456_Figure_1_figure_supplement_1.jpg
- elife_poa_e65456_Figure_2_figure_supplement_1.eps
- elife_poa_e65456_Figure_3_figure_supplement_1.eps
- elife_poa_e65456_Figure_3_figure_supplement_2.eps
- elife_poa_e65456_Figure_4_figure_supplement_1.eps
- elife_poa_e65456_Figure_5_figure_supplement_1.eps
- elife_poa_e65456_Figure_5_figure_supplement_2.eps
- elife_poa_e65456_Figure_5_figure_supplement_3.eps
- elife_poa_e65456_Figure_6_figure_supplement_6.eps
- elife_poa_e65456_Figure_1_source_data_1.docx
