# Supplementary figures and images for: Learning differentially shapes prefrontal and hippocampal activity during classical conditioning
Source: eLife journal article supplement (doi:10.7554/elife.65456), 2021-10-19

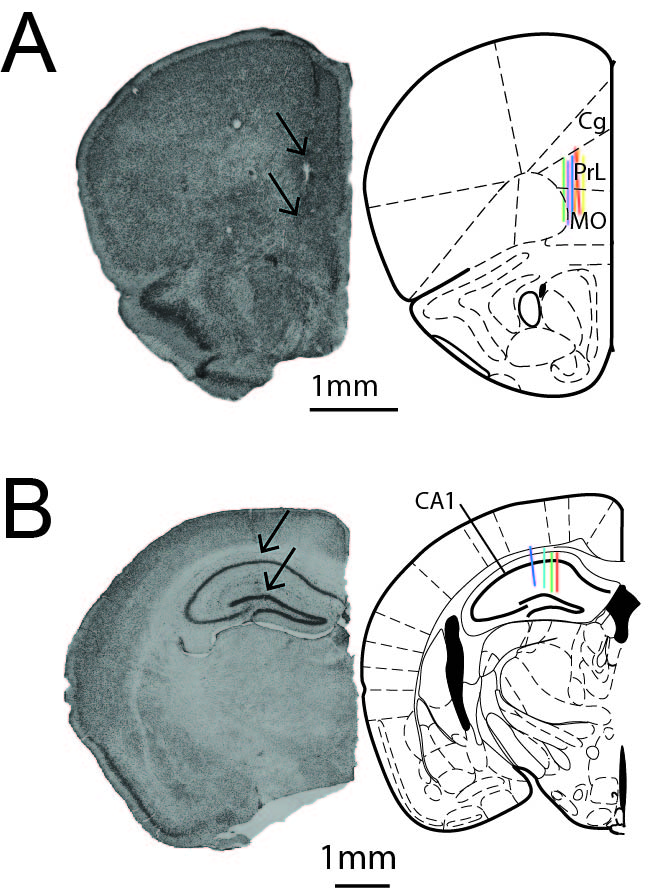

Supplement: supp [file elife-65456-supp-v1.zip › elife_poa_e65456_Figure_1_figure_supplement_1.jpg]
